# Supplementary material for: Investigating Machine Learning Techniques for Predicting Risk of Asthma Exacerbations: A Systematic Review
Source: Springer Nature journal article supplement (doi:10.1007/s10916-024-02061-3), 2024-05-13
Supplement: 10916_2024_2061_MOESM1_ESM.pdf [file 10916_2024_2061_MOESM1_ESM.pdf]

**Table S1:** Results of risk of bias assessment

| Author & year    | Is the rule defined adequately | Representativeness of the cases | Selection of controls | Is the methods and techniques used to construct and validate the models clearly explained | Is the model reliable |
|------------------|--------------------------------|---------------------------------|-----------------------|-------------------------------------------------------------------------------------------|-----------------------|
| Alharbi 2022     | ✓                              | ✗                               | ✗                     | ✓                                                                                         | ✓                     |
| deHond 2022      | ✓                              | ✓                               | ✓                     | ✓                                                                                         | ✓                     |
| doQ 2019         | ✓                              | ✓                               | ✗                     | ✓                                                                                         | ✓                     |
| Farion 2013      | ✓                              | ✓                               | ✓                     | ✓                                                                                         | ✓                     |
| Finkelstein 2016 | ✓                              | !                               | ✗                     | ✗                                                                                         | !                     |
| Finkelstein 2017 | ✓                              | ✓                               | ✗                     | ✓                                                                                         | ✓                     |
| Haque 2021       | ✓                              | ✗                               | ✗                     | ✓                                                                                         | !                     |
| Hurst 2022       | ✓                              | ✓                               | ✓                     | ✓                                                                                         | ✓                     |
| Inselman 2023    | ✓                              | ✓                               | ✓                     | ✓                                                                                         | ✓                     |
| Jiao 2022        | ✓                              | ✓                               | ✓                     | ✓                                                                                         | ✓                     |
| Lisspers 2021    | ✓                              | ✓                               | ✗                     | ✓                                                                                         | ✓                     |
| Lugogo 2022      | ✓                              | ✓                               | ✓                     | ✓                                                                                         | ✓                     |
| Luo 2020         | ✓                              | !                               | ✗                     | ✓                                                                                         | ✓                     |
| Patel 2018       | ✓                              | ✓                               | ✗                     | ✓                                                                                         | ✓                     |
| Priya 2021       | ✓                              | ✓                               | ✗                     | ✓                                                                                         | ✓                     |
| Shin 2018        | ✓                              | ✓                               | ✓                     | ✓                                                                                         | !                     |
| Xiang 2019       | !                              | ✓                               | ✓                     | !                                                                                         | !                     |
| Xu 2011          | ✓                              | !                               | ✓                     | !                                                                                         | !                     |
| Zein 2021        | ✓                              | ✓                               | ✓                     | ✓                                                                                         | ✓                     |
| Zhang 2021       | ✓                              | ✓                               | ✗                     | ✓                                                                                         | ✓                     |

|               |                                                                                   |
|---------------|-----------------------------------------------------------------------------------|
| High quality  |  |
| Some concerns |  |
| Low quality   |  |

|                                                                                                              |
|--------------------------------------------------------------------------------------------------------------|
| <b>Is the rule defined adequately:</b> Has they define the prediction rule clearly                           |
| <b>Representativeness of the cases:</b> Selection of an appropriate spectrum of patients to train the models |
| <b>Selection of controls:</b> Was the models validated in a different group of patients                      |
| <b>Is the methods and techniques used to construct and validate the models clearly explained</b>             |
| <b>Is the model reliable:</b> Does model perform well                                                        |
